# Supplementary material
Source: Springer Nature journal article supplement (https://www.springermedizin.de/resource/supplementary/13063_2011_923_MOESM2_ESM.pdf/9618692)
Supplement: MOESM2 [file 9618692]

# INPUTS

# OUTCOMES

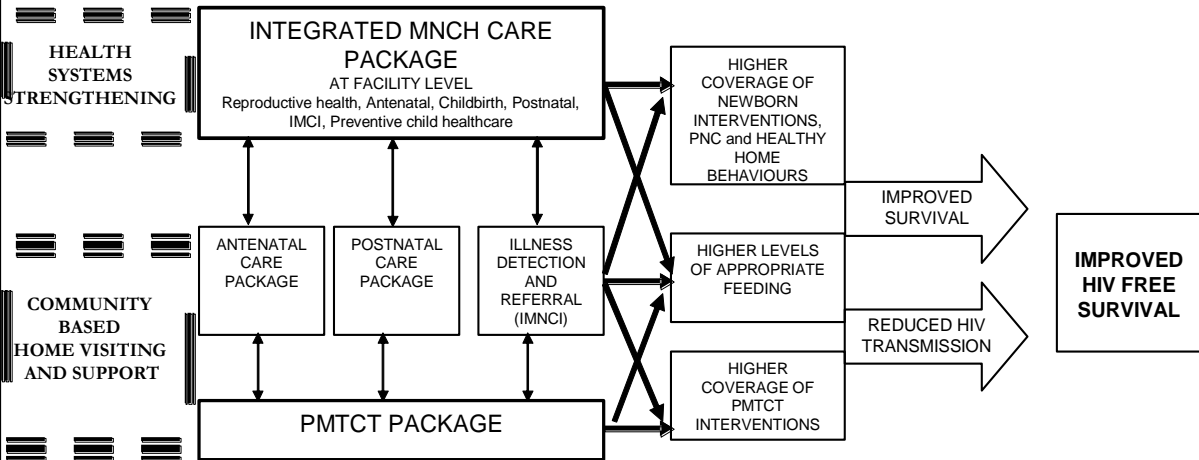

- ASSESSMENT**
- Nevirapine for HIV+ women
  - Nevirapine for HIV exposed baby
  - PNC visits – at home within 48 hrs and 1 week clinic visit
  - Cotrimoxazole for baby from 6 weeks
  - PCR testing 6 weeks
  - Exclusive breastfeeding or compliance with appropriate feeding choice
  - Care seeking behaviours
  - Use of dual protection (family planning and HIV protection)
  - Maternal mental state
  - Infant weight and length at 12 weeks

- ASSESSMENT**
- NMR
  - HIV free survival at 12 weeks
